# Supplementary material for: Adjacent segment degeneration or disease after cervical total disc replacement: a meta-analysis of randomized controlled trials
Source: Springer Nature journal article supplement (doi:10.1186/s13018-018-0940-9), 2018-10-03
Supplement: MOESM1 [file 16170244]

**S1 Table. Excluded studies and main reason for exclusion**

| <b>Author</b>          | <b>Excluded Study</b>                                                                                                                                                                                                | <b>Main Reason</b>                         |
|------------------------|----------------------------------------------------------------------------------------------------------------------------------------------------------------------------------------------------------------------|--------------------------------------------|
| Boselie TF<br>(2015)   | Cervical spine kinematics after anterior cervical discectomy with or without implantation of a mobile cervical disc prosthesis; an RCT.                                                                              | Follow up < 24 months                      |
| Karabag H<br>(2014)    | Arthroplasty versus fusion for single-level cervical disc disease.                                                                                                                                                   | The number of participants < 30            |
| Kang L<br>(2013)       | Artificial disk replacement combined with midlevel ACDF versus multilevel fusion for cervical disk disease involving 3 levels.                                                                                       | The number of participants < 30            |
| Zhang X<br>(2012)      | Randomized, controlled, multicenter, clinical trial comparing BRYAN cervical disc arthroplasty with anterior cervical decompression and fusion in China.                                                             | Undesired result on ASD                    |
| Nabhan A<br>(2011)     | Assessment of adjacent-segment mobility after cervical disc replacement versus fusion: RCT with 1 year's results.                                                                                                    | Follow up < 24 months                      |
| Kelly MP<br>(2011)     | Adjacent segment motion after anterior cervical discectomy and fusion versus Prodisc-c cervical total disk arthroplasty: analysis from a randomized, controlled trial.                                               | Undesired result on ASD                    |
| Coric D<br>(2010)      | Prospective study of cervical arthroplasty in 98 patients involved in 1 of 3 separate investigational device exemption studies from a single investigational site with a minimum 2-year follow-up. Clinical article. | The same patients and data(Coric D 2011)   |
| Burkus JK<br>(2010)    | Long-term clinical and radiographic outcomes of cervical disc replacement with the Prestige disc: results from a prospective randomized controlled clinical trial.                                                   | The same patients and data(Burkus JK 2014) |
| Park DK<br>(2011)      | Index and adjacent level kinematics after cervical disc replacement and anterior fusion: in vivo quantitative radiographic analysis.                                                                                 | Follow up < 24 months                      |
| Garrido BJ<br>(2010)   | Clinical outcomes of Bryan cervical disc arthroplasty a prospective, randomized, controlled, single site trial with 48-month follow-up.                                                                              | The number of participants < 30            |
| Anakwenze OA<br>(2009) | Sagittal cervical alignment after cervical disc arthroplasty and anterior cervical discectomy and fusion: results of a prospective, randomized, controlled trial.                                                    | Undesired result on ASD                    |
| Anderson PA(2008)      | Comparison of adverse events between the Bryan artificial cervical disc and anterior cervical arthrodesis.                                                                                                           | The same patients and data(Sasso RC 2011)  |
| Sasso RC<br>(2008)     | Cervical kinematics after fusion and bryan disc arthroplasty.                                                                                                                                                        | The number of participants < 30            |

|                       |                                                                                                                                                                   |                                            |
|-----------------------|-------------------------------------------------------------------------------------------------------------------------------------------------------------------|--------------------------------------------|
| Hauerberg J<br>(2008) | Anterior cervical discectomy with or without fusion with ray titanium cage: a prospective randomized clinical study.                                              | Undesired result on ASD                    |
| Sekhon LH<br>(2007)   | Magnetic resonance imaging clarity of the Bryan, Prodisc-C, Prestige LP, and PCM cervical arthroplasty devices.                                                   | The number of participants < 30            |
| Mummaneni PV(2007)    | Clinical and radiographic analysis of cervical disc arthroplasty compared with allograft fusion: a randomized controlled clinical trial.                          | The same patients and data(Burkus JK 2014) |
| Nabhan A<br>(2007)    | Disc replacement using Pro-Disc C versus fusion: a prospective randomised and controlled radiographic and clinical study.                                         | Follow up < 24 months                      |
| Bartels RH(2006)      | Design of the PROCON trial: a prospective, randomized multi-center study comparing cervical anterior discectomy without fusion, with fusion or with arthroplasty. | The number of participants < 30            |
| Coric D(2006)         | Prospective randomized controlled study of the Bryan Cervical Disc: early clinical results from a single investigational site.                                    | The same patients and data(Coric D 2011)   |
| Porchet F(2004)       | Clinical outcomes with the Prestige II cervical disc: preliminary results from a prospective randomized clinical trial.                                           | The number of participants < 30            |
